# Supplementary material
Source: publisher figshare collection journal article supplement (https://tandf.figshare.com/ndownloader/files/13368203)
Supplement: Supplementary file 1 [file 13368203]

**Tree Cover Response to Climate Change in the Forest-Tundra of North-central Canada: Fire-Driven Decline, Not Northward Advance**

Supplementary Material

Table S1. Terrestrial vegetation types and characteristic plant species within the study region (after Larsen 1965; Timoney 1988; Timoney et al. 1993). Vascular plant nomenclature follows Porsild and Cody (1980).

| Cover Type | Code | Vegetation |
| --- | --- | --- |
| living trees (Figure S2) | tstric | forests, woodlands, clumps, and scattered trees with minimum height of ~ 2 m; *Picea mariana* on dry mesic to wet mesic acidic soils and is the areally dominant tree cover in the region*; Larix laricina* on mesic to wet acidic and neutral soils; *Picea glauca* on neutral soils and eolian sands; *Betula papyrifera* along drainages and on sands; trees typically in association with *Betula glandulosa, Salix glauca, S. planifolia, Vaccinium vitis-idaea, V. uliginosum, Ledum decumbens*, *L. groenlandicum*, *Empetrum nigrum, Carex bigelowii, Cladonia, Stereocaulon, Polytrichum, Ptilidium*; at northern limit in tundra matrix |
| recently-burned trees (Figure S3) | burn | a variety of plant communities depending on the pre-fire vegetation, fire intensity, soils, and time since fire; typically differ in tone, graininess, and/or color from surrounding unburned vegetation; distinct burn boundaries may be present; often dominated by *Betula, Salix*, ericads, and herbs; inspection of burns of known age indicates the type is discernible for ~20 years as a fire-origin treeless community; distinctness of burned areas fades over time; after ~ 25 years, burns are either young tree communities or persist as fire-origin upland tundra or tall shrub |
| potentially-treed | t | the aggregate zonal type for sum of living trees and recently-burned trees; portion of landscape that is potentially treed given successful post-fire regeneration;  for vegetation communities, see tstric and burn |
| upland  tundra ( Figure S4) | utu | an aggregate zonal type of xeric to wet mesic mineral soils typified by dwarf ericad/lichen on xeric, exposed sites (prominent species: *Empetrum nigrum, Loiseleuria procumbens, Poa glauca, Vaccinium vitis-idaea, Saxifraga tricuspidata, Carex bigelowii, Alectoria ochroleuca, Cornicularia divergens, Polytrichum*); dwarf birch-*Salix*/ericad/lichen tundra on mesic sites (prominent species: *Betula glandulosa, B. occidentalis, Salix glauca, S. planifolia, Arctostaphylos alpina, Empetrum nigrum, Vaccinium uliginosum, V. vitis-idaea, Cetraria, Cladonia, Stereocaulon, Polytrichum, Dicranum*), and ericad/*Carex* on wet mesic sites (prominent species: *Ledum decumbens, Vaccinium vitis-idaea, V. uliginosum, Carex rotundata*) that are transitional to treeless wetland and tall shrub |
| tall shrub  (Figure S5, S6) | stu | a well-watered azonal type of shores, drainages, wet slopes, thickets, and wetland margins; typical dominants *Salix glauca, S. planifolia, Betula glandulosa, B. occidentalis, Alnus crispa;* shrubs ≥1.5 m tall |
| treeless wetland (Figure S7) | wtu | an aggregate azonal type of wet mineral and organic soils on level to depressional sites; bogs, fens, bog-fens, peat plateaus, palsas, wet sedge meadow, and tussock tundras; characteristic species include *Carex aquatilis, C. chordorhiza, C. rotundata, C. saxatilis, Ledum decumbens, Vaccinium uliginosum, V. vitis-idaea, Rubus chamaemorus, Andromeda, Eriophorum vaginatum, Scirpus caespitosus,* various *Sphagnum* spp., *Aulacomnium*, brown mosses |
| rockland (Figure S2) | r | azonal sparse vegetation of saxicolous lichens and mosses; growth limited by scarcity of soil on exposed bedrock; limited extent in study region |
| eroding (Figure S8) | e | azonal exposed sand with sparse vegetation of mosses, lichens, and graminoids; limited extent in study region |

Figure S1. Forest-tundra landscape patterns (image ~ center 60 º 58.8’ N, 103 º 22.8’ W) on a portion of one footprint. Double-headed arrows tie landscape features on the footprints (A,B) to the oblique images (C-H). (A) 1955, extensive peat plateaus (pp) dominate the west, tree stands dominate the center, and upland tundra dominates the east; (B) 2006, after a major wildfire; much of the reddish-green area is 8-year old burn. Oblique aerial images (2006): (C) mosaic of upland tundra (utu), trees (t), tall shrub (stu), and wetland (wetland), view to W; (D) glaciofluvial deposits surrounded by streamlined morainal deposits supporting t, utu; sparsely-vegetated on esker tops, view to NW; (E) mosaic of t, stu, utu, and bog-fen wtu in foreground, transition to burned trees (b) in middle-distance, view to W; (F) the 1998 wildfire burned much of the landscape here including extensive peat plateau wtu; inclusions of unburned trees, wtu, and utu occur within the burn, view to WNW; (G) unburned mosaic of t and bog-fen wtu abuts the extensive 1998 burn in mid-distance, view to N; (H) within the burn, patches of unburned trees are adjacent to shores, drainages, or wtu, view to NW. Over the period 1955-2006, afforestation would have occurred but the extensive burn resulted in net loss of living tree cover. Credits: **A** National Air Photo Library, Ottawa. **B** Google Earth, **C-H** GNWT, http://www.geomatics.gov.nt.ca.


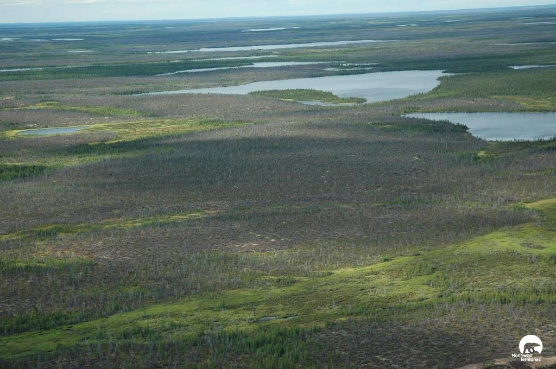

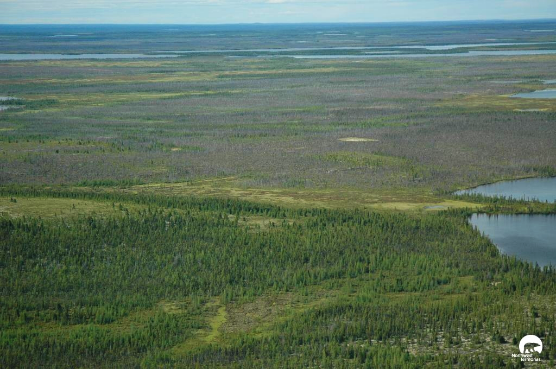

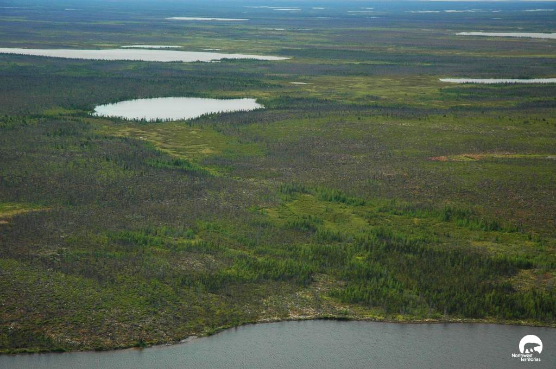

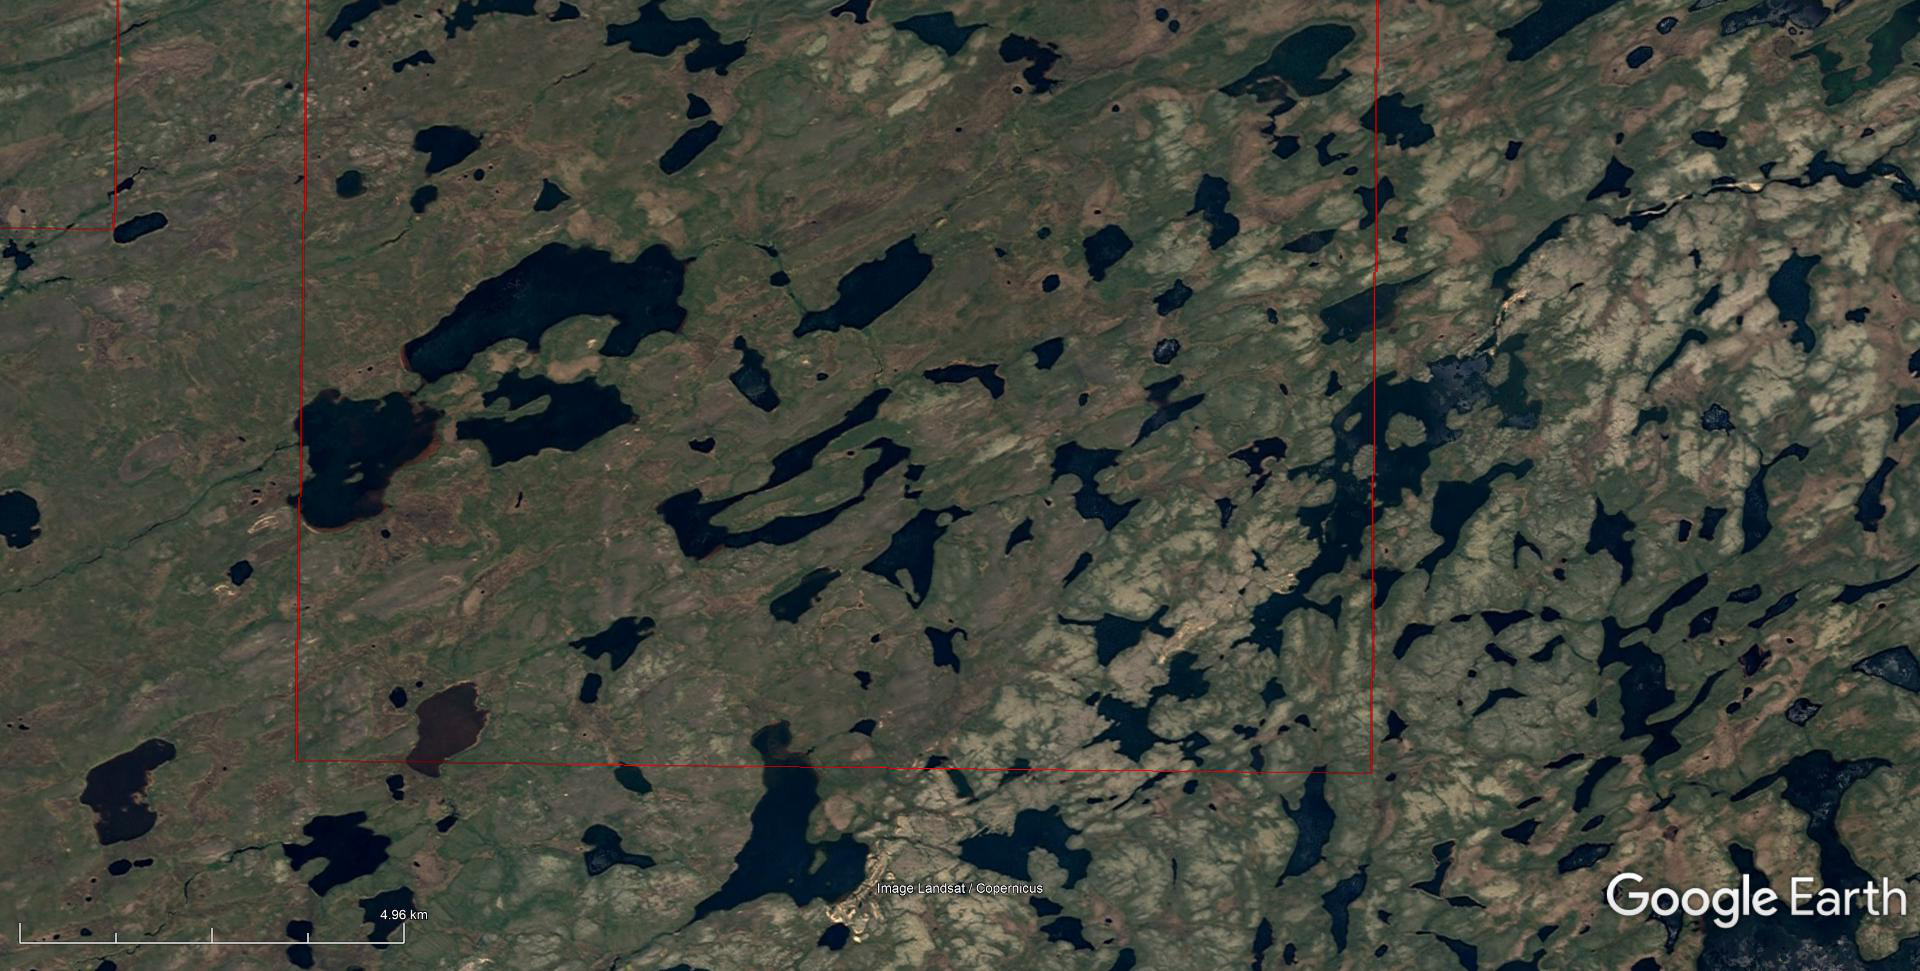

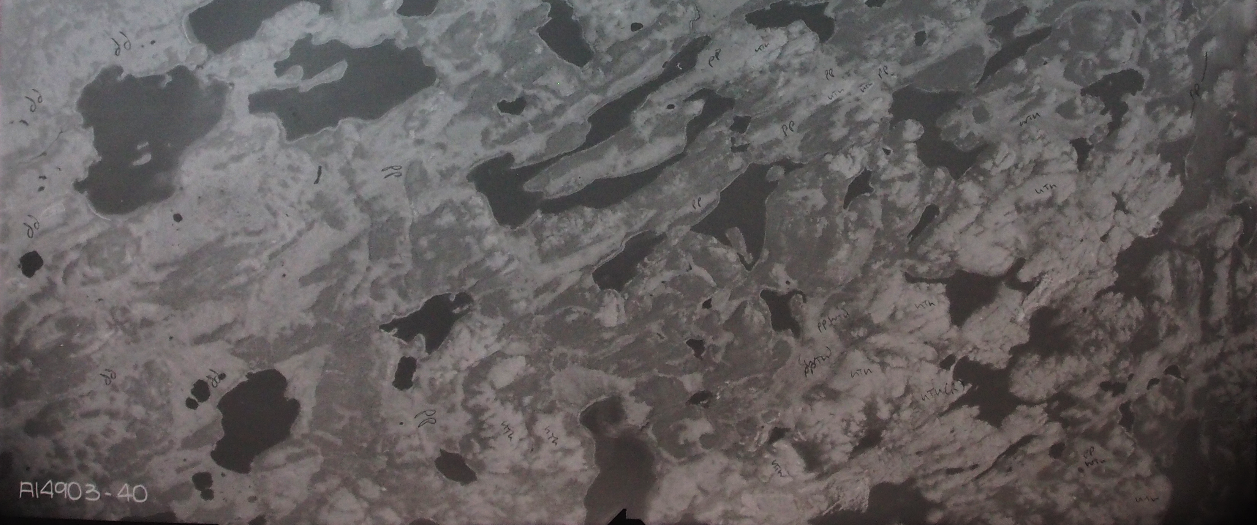

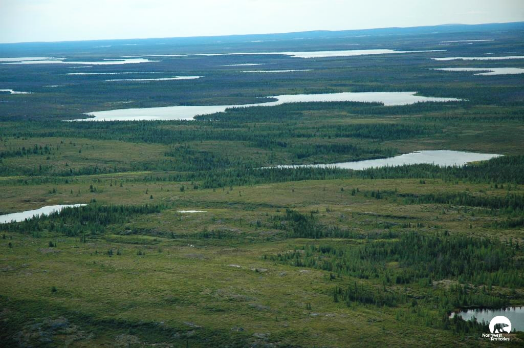

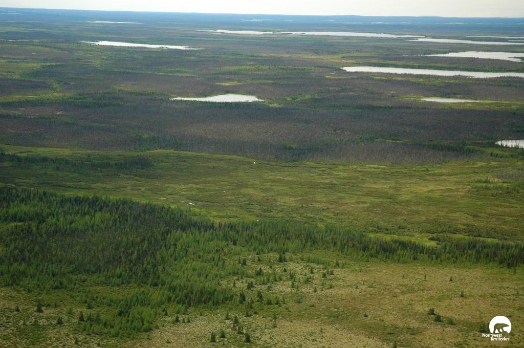

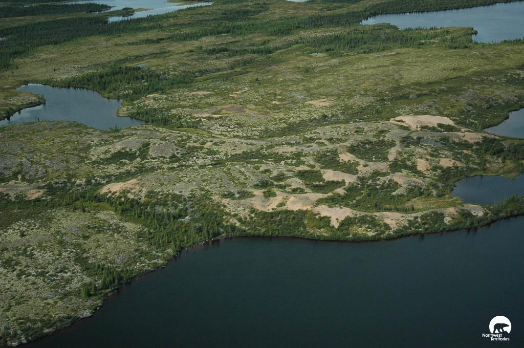


wtu: pp

utu

wtu

t, stu

utu

utu

1998 burn: mosaic of b,burned wtu, with inclusions of t, wtu, utu

utu

t

e

wtu (bog-fen)

utu

t

t, stu

t

t

b

utu

b

t

wtu

b

utu

b

b boundary

utu

t

wtu

b,t,wtu

t

b

b

wtu

b

b

t

1 km

utu

1 km

B

A

H

G

F

E

D

t

C

t

t

N

N

Part of footprint kt1443


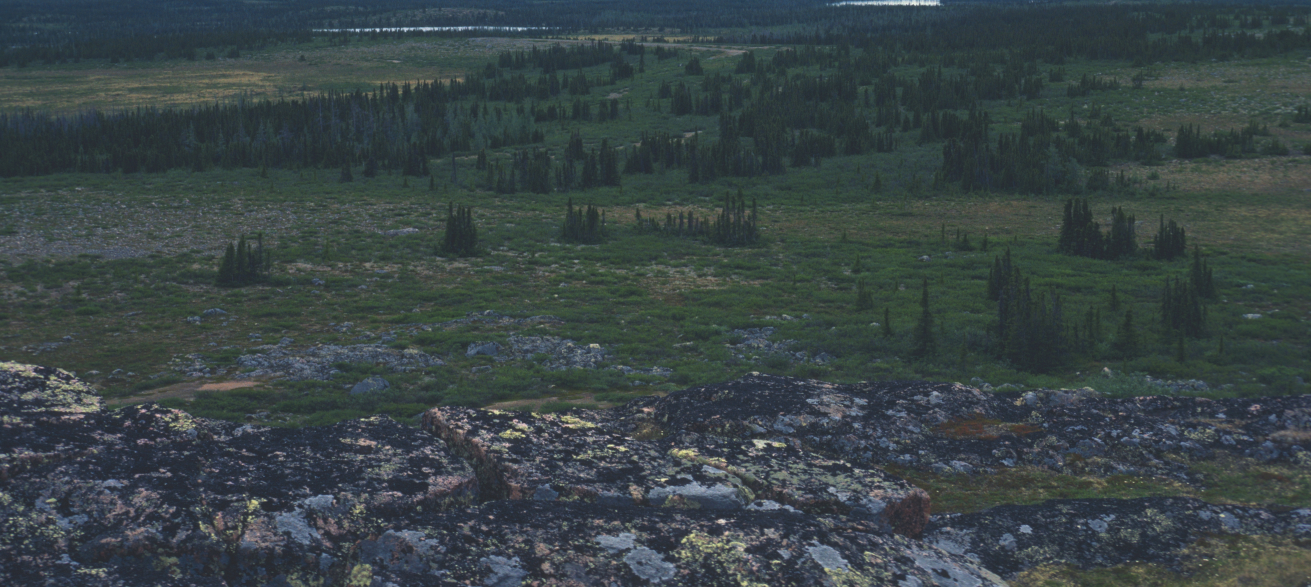


Figure S2. Landscape mosaic of *Picea mariana* clones in a *Betula glandulosa* – ericad upland tundra matrix. Saxicolous lichens on granitic gneiss cover the rockland in foreground. Light-toned low-lying areas are bog-fens and tussock tundras dominated by a suite of Cyperaceae. July 1983, at 61º 25.33’N, 103º 41.75’W.


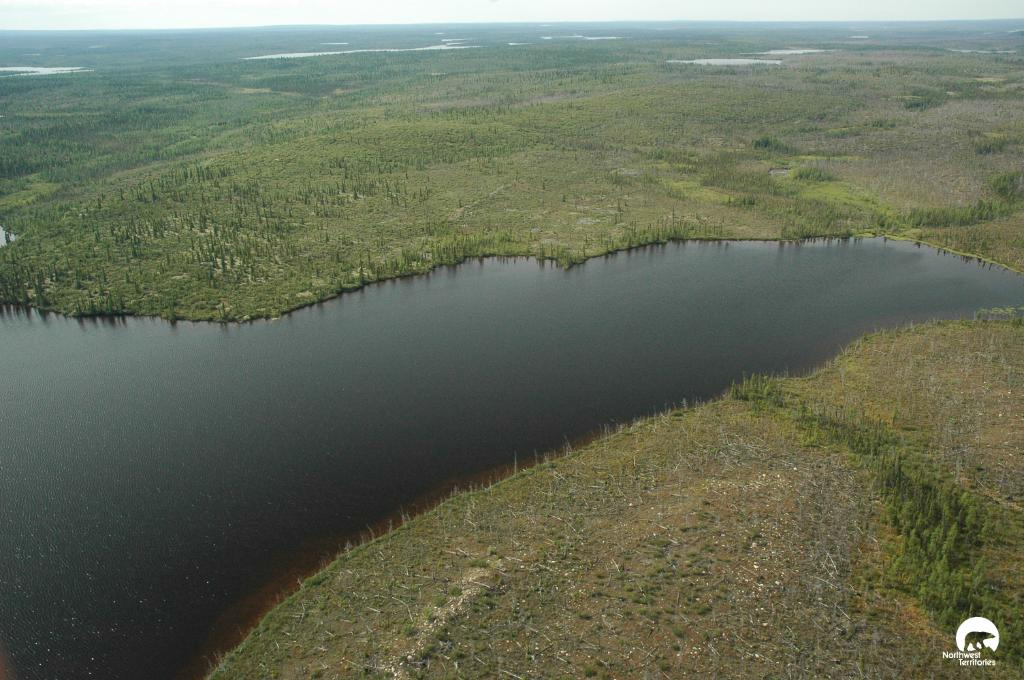


**b**

**b**

**b**

Figure S3. These burned *Picea mariana* woodlands (b) in the southern portion of the forest-tundra appear to lack tree regeneration. Wildfire activity has been high in this area and is acting to depress tree cover relative to the 1950s. A large fire in 1970 was followed by fires in 1991, 1992, 1997, 2004, and 2010. Fire polygons indicate that some areas here burned in both 1970 and 1992. Trees on moister sites such as drainages, shores, and wetland margins often survive fires. 22 July 2006, at 60º 06.12’N, 103º 39.24’W.


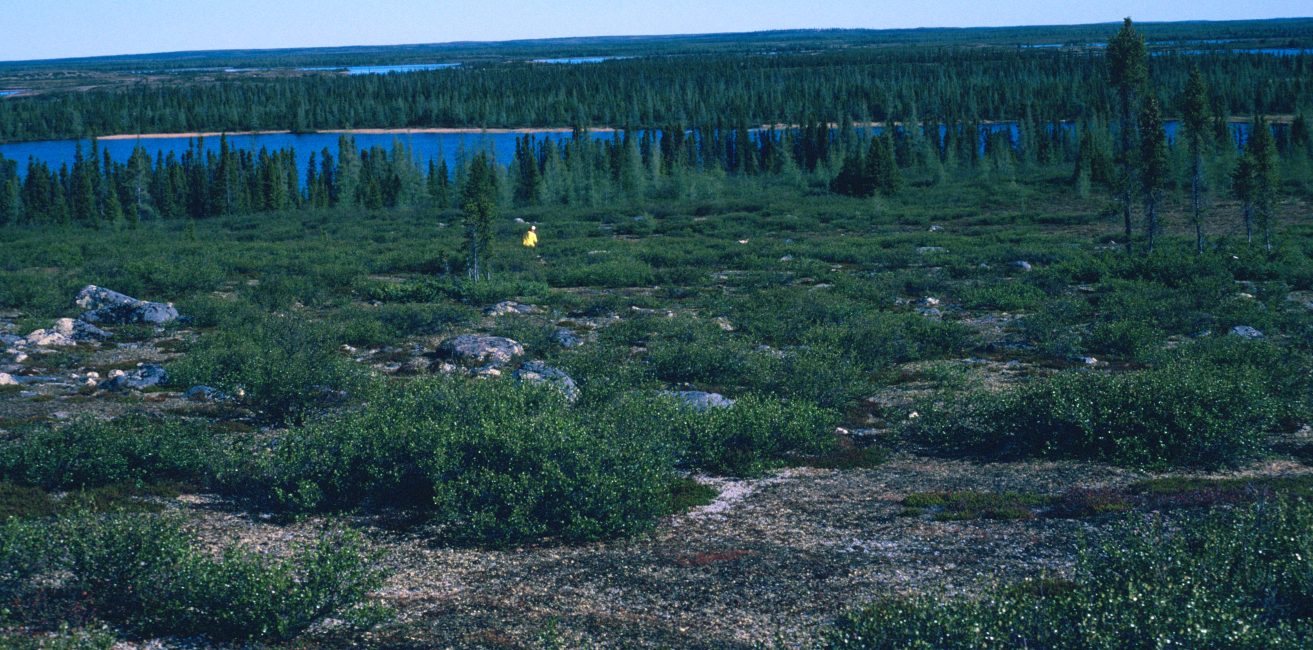


Figure S4. Dwarf birch/ericad/lichen upland tundra on acidic loamy sand Orthic Dystric Brunisol drumlin in Firedrake Lake area. Dominants are *Betula glandulosa, Empetrum nigrum, Ledum decumbens, L. groenlandicum, Vaccinium vitis-idaea, V. uliginosum, Carex bigelowii*, and a variety of *Cladonia, Cornicularia*, and *Dicranum* species. A mixed woodland of *Picea mariana* and *Larix laricina* covers the lower slope. 27 June 1983, site S33 at 61º 23.33’N, 104º 15.33’W.


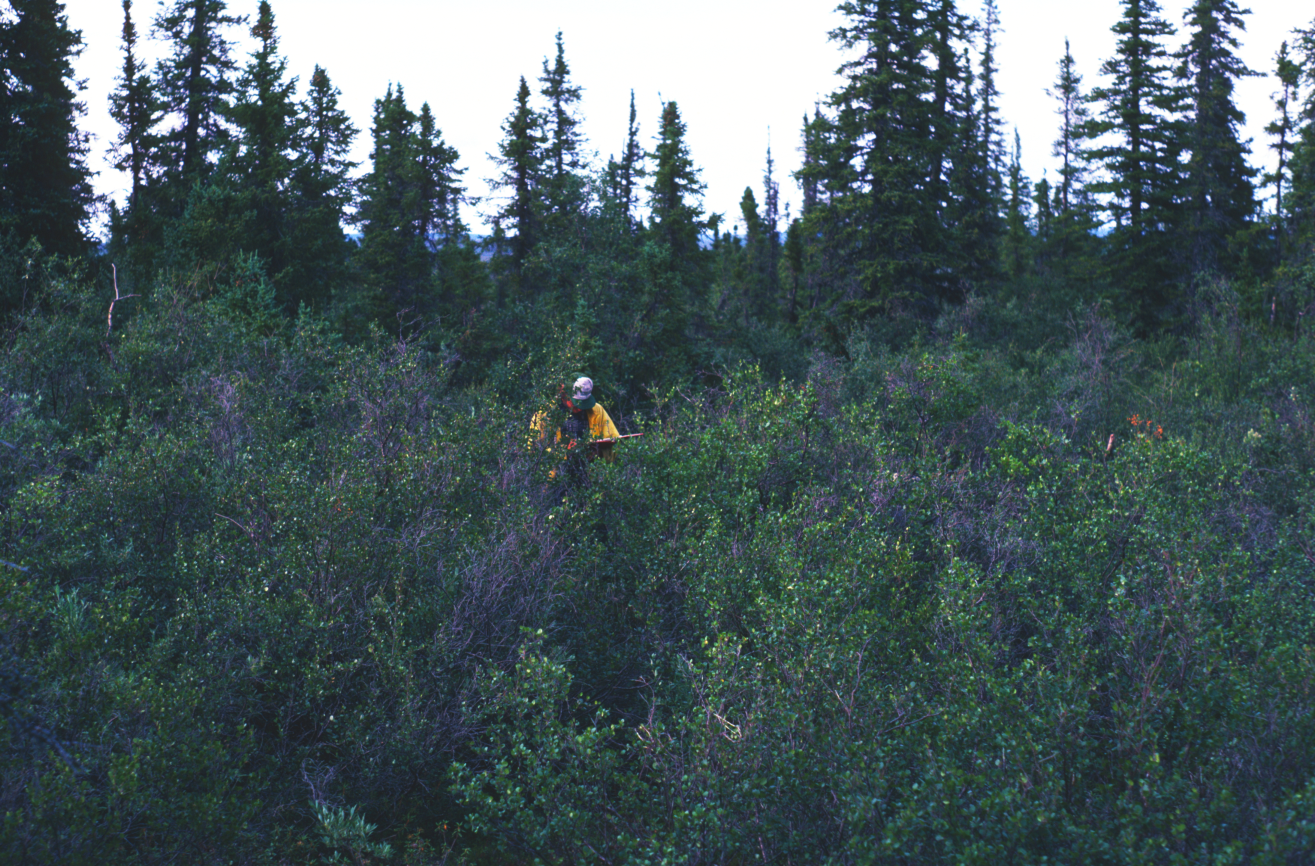


Figure S5. A tall shrub community dominated *by Betula glandulosa, B. occidentalis-B. glandulosa* hybrids, *Salix glauca,* and *S. planifolia* occupies the well-watered periphery of a *Picea glauca* woodland. 30 July 1983, at site ST22, 61º 47.83’N, 103º 15.25’W.


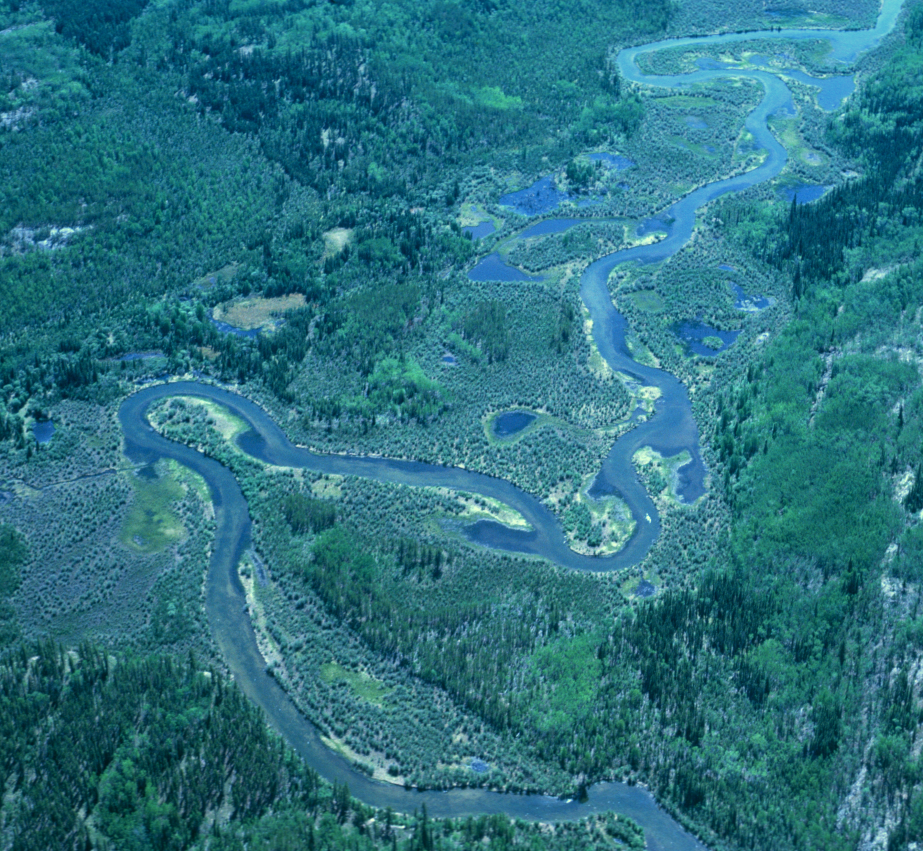


**a**

**a**

**a**

Figure S6. Azonal riparian tall willow savannah (a) in the high boreal closed crown forest region (Bradley et al. 1982) SW of the study region. Tall shrub communities like this one are boreal elements absent from subarctic and arctic landscapes. 23 June 1983, at 60º 07.69’N, 111º 02.20’W.


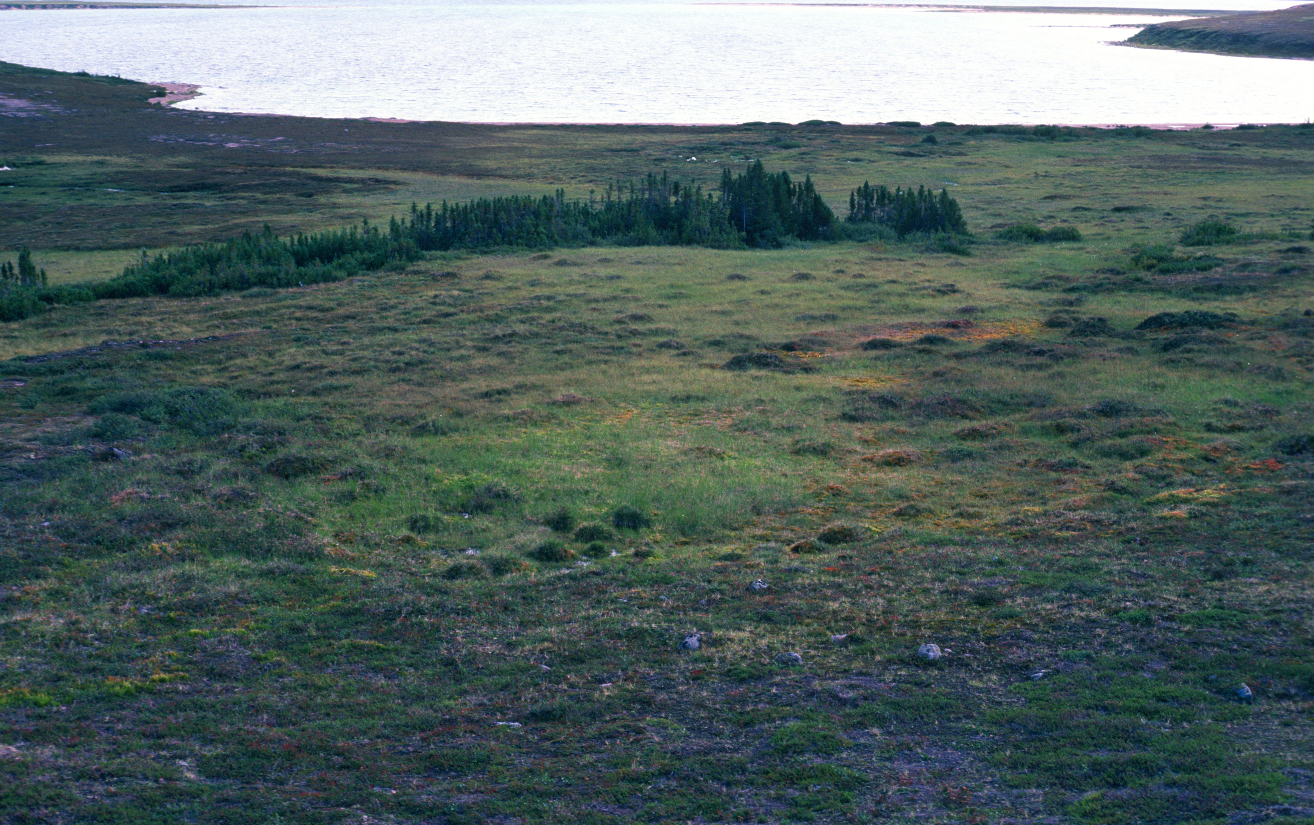


b

e

a

d

c

Figure S7. Treeless wetland is an aggregate type. In this area, light-toned sedge meadows (a), bog-fens (b), and dark-toned peat mounds and palsas (c) form a mosaic with dwarf ericad upland tundra (d) and black spruce clumps (e). 20 August 1983, at 62º 25.33’N, 103º 31.83’W.


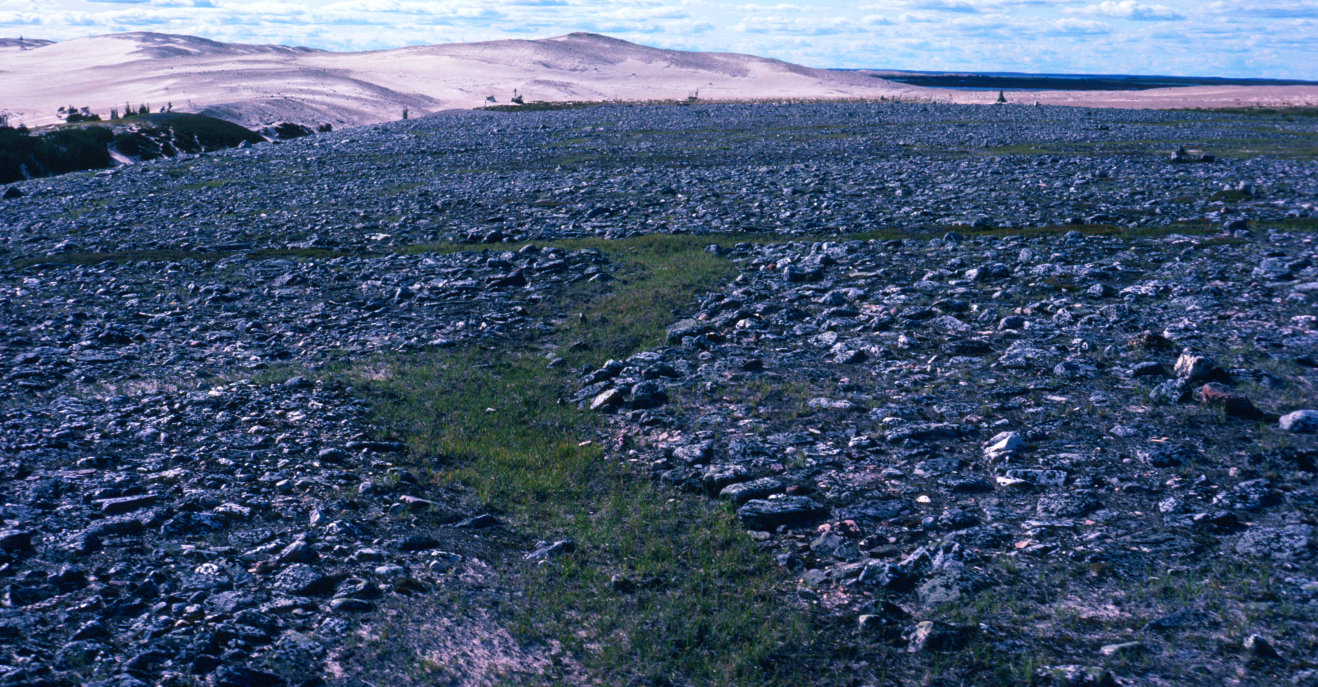
Figure S8. A foreground of stony upland lichen tundra with large ice-wedge polygons gives way to a sparsely-vegetated sandy esker delta in the distance, an example of the eroding cover type. 22 August 1983, near site S60 at 62º 18.42’N, 104º 19.17’W.

**Agreement between CRU TS temperature and precipitation data and Ennadai weather station data**

Agreement between the Ennadai Lake weather station 1951-80 normal for annual mean temperature of –9.3º C (Environment Canada 1982) and the 1951-80 normal based on CRU TS data of –9.7º C substantiated the CRU TS time series for annual temperature (Figure S9A). Similarly, agreement between the Ennadai Lake weather station 1951-80 normal for annual precipitation 294.5 mm (Environment Canada 1982) with the 1951-80 normal based on CRU TS data of 302.2 mm lends support for the CRU TS time series for annual precipitation (Figure S9B).

Figure S9.Relationship between CRU TS interpolated and Ennadai weather station measured **A** mean monthly temperature and **B** monthly total precipitation.

B

A

**Ennadai Monthly Precipitation (mm)**

**Ennadai Monthly Mean Temperature (C)**

**CRUTS Total Monthly Precipitation (mm)**

**CRUTS Monthly Mean Temperature (C)**

y = 13.173 + 0.522 (x), R2 = 0.402, n = 440, *P*<0.00001

y = -0.395 + 1.000 (x), R2 = 0.994, n = 467, *P*<0.00001


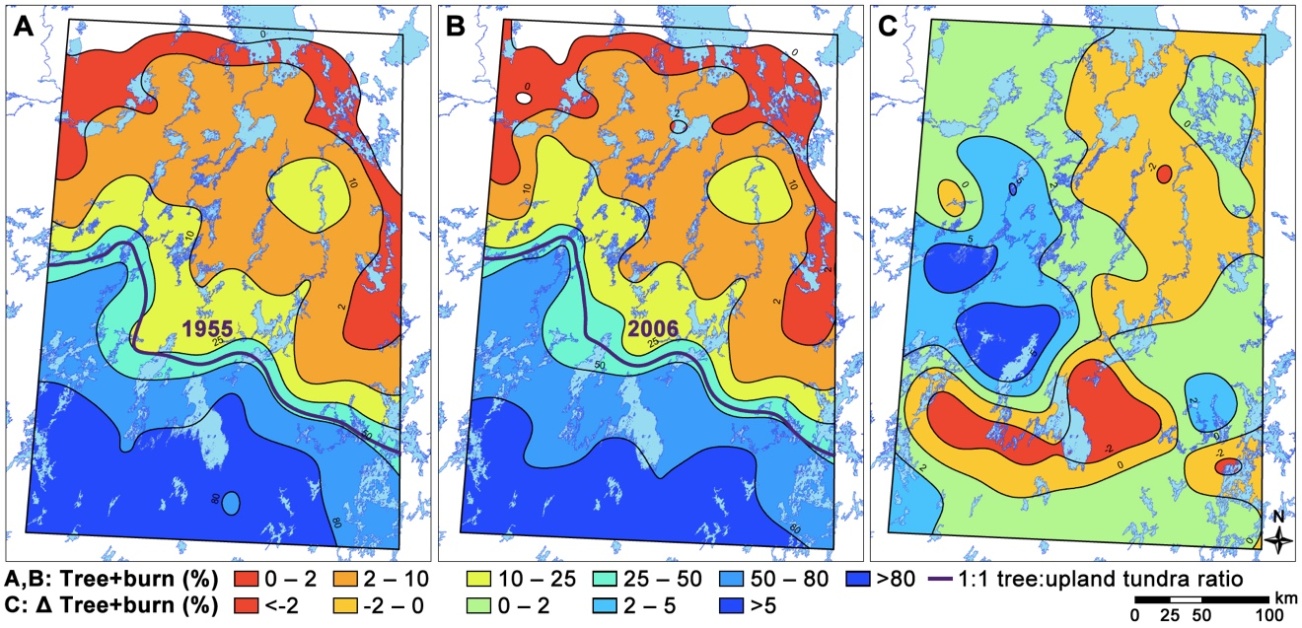


Figure S10. Isolines of potential tree cover (living trees + recently-burned trees), **A** 1955, **B** 2006, and **C** change in cover over time. This variable assumes that all burned tree stands regenerate to trees. The bold lines depict the 1:1 tree:upland tundra cover isoline for 1955 (A) and 2006 (B).folder = revised maps\, tcalc_old_draft2.png, tcalc_new_draft2.png, Td_map_draft2.png;

**t, 1955**

**t change, 1955 to 2006**


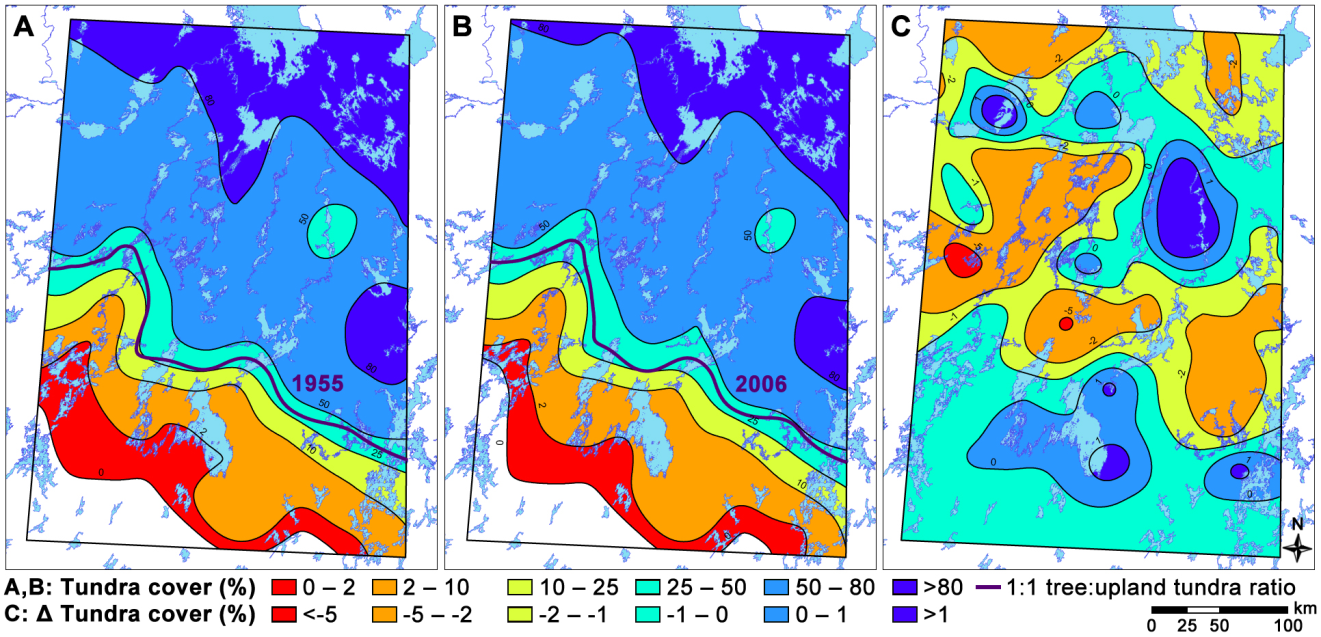


Figure S11. Isolines of upland tundra cover, **A** 1955, **B** 2006, and **C** change in cover over time. . folder = revised maps\, utu_old_map_draft2.png, utu_new_map_draft2.png, Utud_map_draft2.png The bold lines depict the 1:1 tree:upland tundra cover isoline for 1955 (A) and 2006 (B). new version pasted from: FigureS09.r2.jpg

**change in utu, 1955 to 2006**

**utu, 1955**

C

**References**

Environment Canada. 1982. Canadian climate normals 1951-1980, Temperature and Precipitation, The North – Y.T. and N.W.T. Environment Canada, Atmospheric Environment Service, Ottawa, Canada.

Larsen, JA. 1965. The vegetation of the Ennadai Lake area N.W.T.: Studies in subarctic and arctic

bioclimatology. Ecol Monogr. 35:37-59.

Porsild AE, Cody WJ. 1980. Vascular plants of Continental Northwest Territories. National Museum of Natural Sciences, Ottawa, Canada. No. NM92-71/1979.

Timoney KP. 1988. A geobotanical investigation of the subarctic forest-tundra of the Northwest Territories [dissertation]. Edmonton, Alberta, Canada: University of Alberta.

Timoney KP, La Roi GH, Zoltai SC, Robinson AL. 1993. Vegetation communities and plant distributions and their relationships with parent materials in the forest-tundra of Northwestern Canada. Ecogr. 16:174-188.
